# Supplementary material for: Myriophyllum-like hierarchical TiN@Ni3N nanowire arrays for bifunctional water splitting catalysts
Source: Royal Society of Chemistry journal article supplement (doi:10.1039/c6ta00356g), 2016-01-01
Supplement: c6ta00356g1.pdf [file c6ta00356g1.pdf]

## Supporting Information

# Myriophyllum-like Hierarchical TiN@Ni<sub>3</sub>N Nanowire Arrays for Bifunctional Water Splitting Catalyst

Qiting Zhang,<sup>a</sup> Yuhang Wang,<sup>a</sup> Yongcheng Wang,<sup>a</sup> Abdullah M. Al-Enizi,<sup>b</sup> Ahmed A. Elzatahry,<sup>c</sup>

Gengfeng Zheng<sup>a,\*</sup>

<sup>a</sup>Laboratory of Advanced Materials, Department of Chemistry, Collaborative Innovation Center of Chemistry for Energy Materials, Fudan University, Shanghai 200433, China

<sup>b</sup> Department of Chemistry, College of Science, King Saud University, Riyadh 11451, Saudi Arabia.

<sup>c</sup>Materials Science and Technology Program, College of Arts and Sciences, Qatar University, PO Box 2713, Doha, Qatar.

\* Address correspondence to: [gfzheng@fudan.edu.cn](mailto:gfzheng@fudan.edu.cn) (G.Z.)

## Experimental Section

Ti foil (thickness: 100  $\mu\text{m}$ ), sodium hydroxide (NaOH), ethanol, acetone, nickel(II) nitrate hexahydrate ( $\text{Ni}(\text{NO}_3)_2 \cdot 6\text{H}_2\text{O}$ ), concentrated ammonium hydroxide (25.0–28.0 wt%), concentrated HCl (36.0–38.0 wt%), nickel chloride hexahydrate ( $\text{NiCl}_2 \cdot 6\text{H}_2\text{O}$ ), ammonium fluoride ( $\text{NH}_4\text{F}$ ), urea, potassium hydroxide (KOH), sulfuric acid ( $\text{H}_2\text{SO}_4$ ) were of analytical grade and purchased from Shanghai Chemical Corp. All chemicals were used as received without further purification. Deionized (DI) water was used for all experiments.

### Calculation of electrochemically active area ( $R_f \times 10^3$ ):

The roughness factor ( $R_f \times 10^3$ ) was evaluated from the double-layer capacitance ( $C_{dl}$ ) charging curve using cyclic voltammetry in a narrow potential range (0.3–0.5 V) through the equation:  $R_f \times 10^3 = C_{dl}/60 \mu\text{F} \cdot \text{cm}^{-2}$  (capacitance of a smooth surface),<sup>13</sup> in which  $C_{dl} = I_{cap}/(dE/dt)$ , where  $I_{cap}$  is the capacitive current at the midpoint of the scan range and  $dE/dt$  is the scan rate.

### Calculation of turnover frequency (TOF):

The TOF values of  $\text{TiN@Ni}_3\text{N}$  and  $\text{Ni}_3\text{N}$  electrode were calculated according to equation:<sup>S1, S2</sup>  
 $\text{TOF} = j \times A / (4 \times F \times m)$ , among which  $j$  is the current density obtained at overpotential of 60 mV in  $\text{A}/\text{cm}^2$ ,  $A$  is the surface area of the electrode,  $F$  is the Faraday efficiency (96,485 /mol), and  $m$  is the number of moles of the  $\text{TiN@Ni}_3\text{N}$  and  $\text{Ni}_3\text{N}$  deposited onto the electrodes.

## Supporting Figures

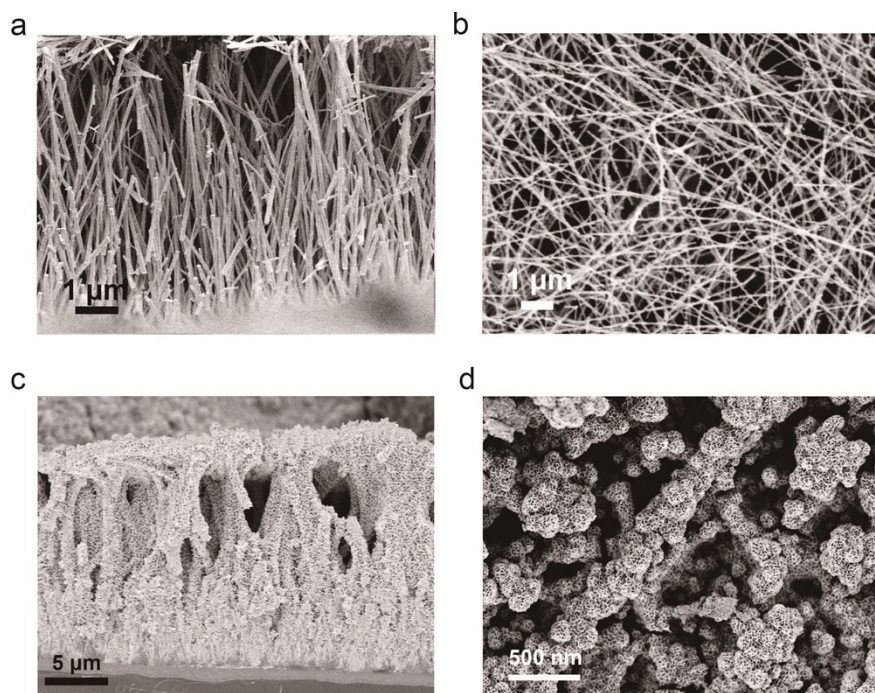

**Figure S1.** SEM images of (a, b) pure TiN nanowires and (c, d) TiN@NiO nanowires.

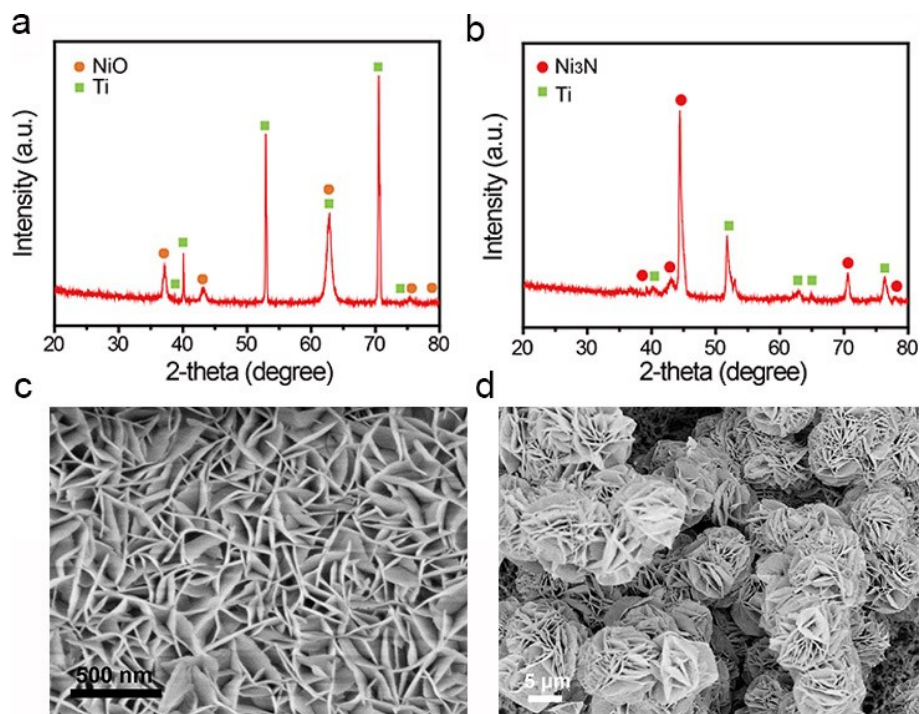

**Figure S2.** XRD patterns of (a) NiO nanosheets (PDF No. 71-1179) and (b) Ni<sub>3</sub>N nanosheets (PDF No. 10-0280), along with the Ti foil substrate. SEM images of (c) NiO nanosheets and (d) Ni<sub>3</sub>N nanosheets grown directly on Ti foil.

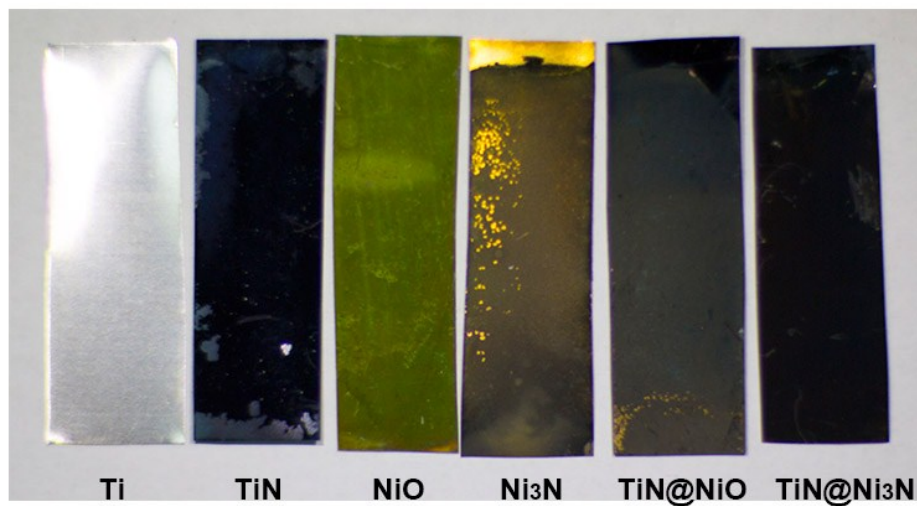

**Figure S3.** Photographs of the as-synthesized samples grown in Ti foils.

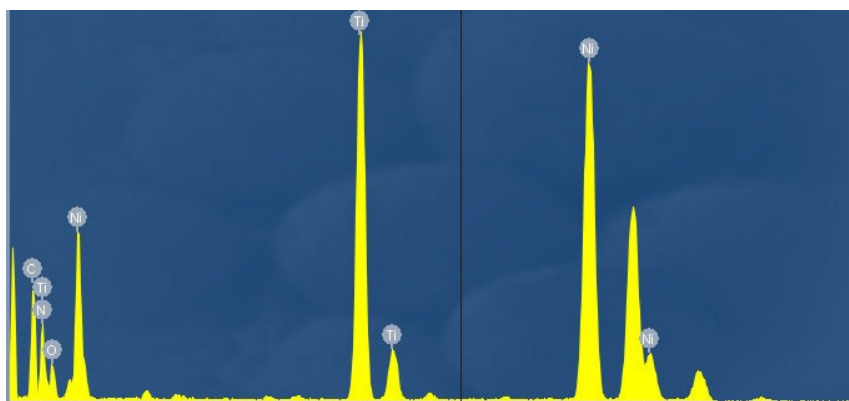

**Figure S4.** EDS spectrum of the TiN@Ni<sub>3</sub>N nanowire arrays.

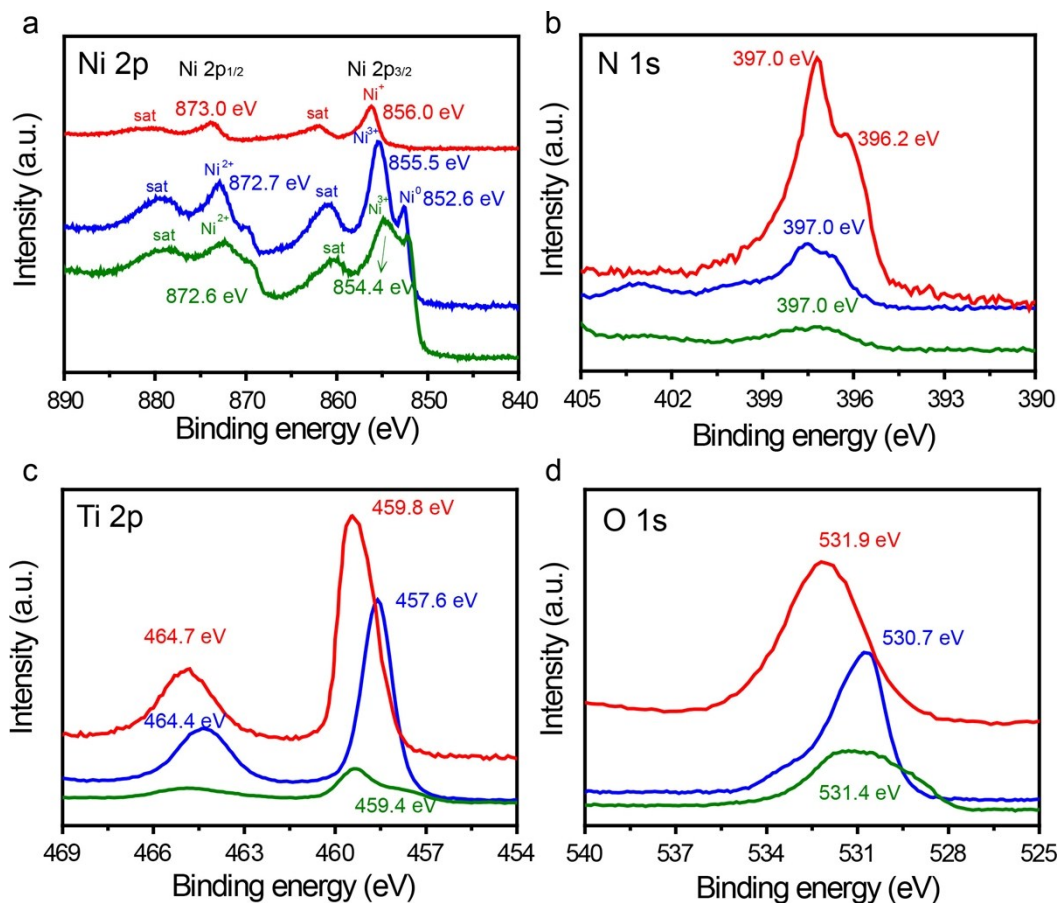

**Figure S5.** High-resolution XPS spectra of (a) Ni 2p, (b) N 1s, (c) Ti 2p and (d) O 1s. Red curves correspond to the as-prepared samples. Blue curve correspond to the post-HER samples. Green curves correspond to the post-OER samples.

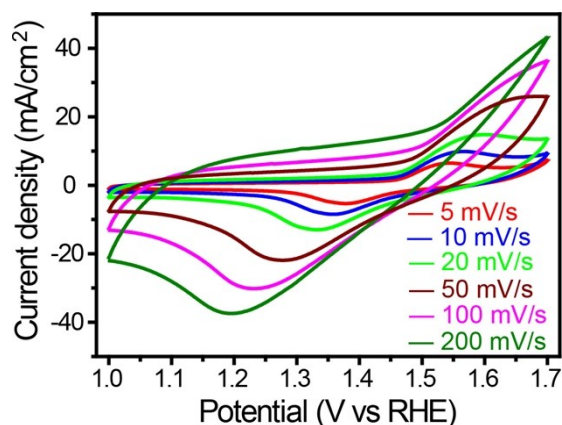

**Figure S6.** CV curves of TiN@Ni<sub>3</sub>N between 1.0 and 1.7 V (vs. RHE) measured at a scan rate of 5 - 200 mV/s in 1 M KOH.

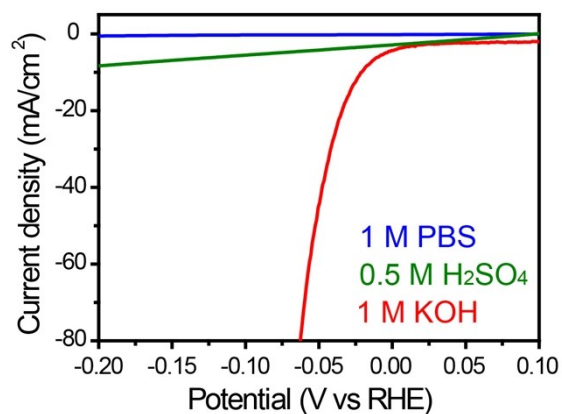

**Figure S7.** LSV curves of TiN@Ni<sub>3</sub>N in neutral electrolyte (blue curve), acid electrolyte (green curve) and alkaline electrolyte (red curve).

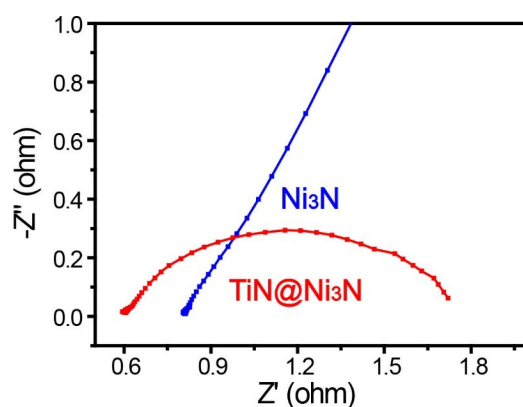

**Figure S8.** Nyquist plots of the TiN@Ni<sub>3</sub>N nanowire arrays and the Ni<sub>3</sub>N nanosheets with enlarged scale.

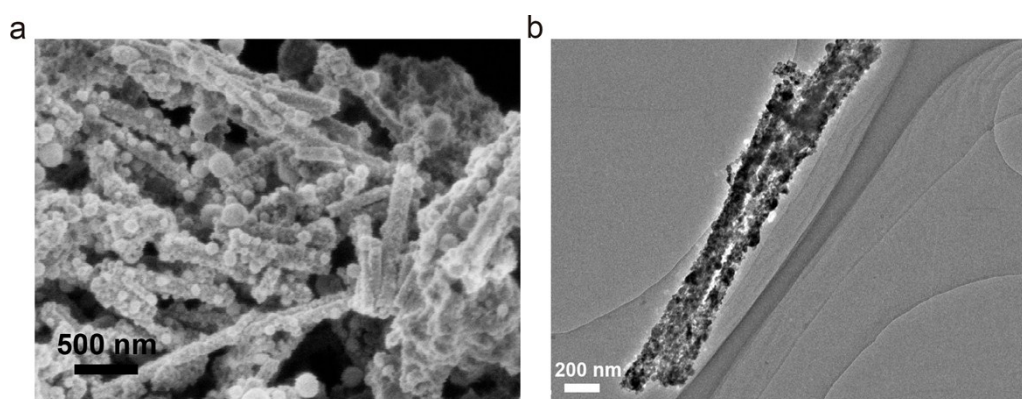

**Figure S9.** (a) SEM and (b) TEM images of the TiN@Ni<sub>3</sub>N nanowires after 10 h of electrocatalytic reaction.

**Table S1.** Comparison of HER electrocatalytic performance between this work and previously reported materials.

| Materials                                                | Electrolyte                          | Scan rate<br>(mV/s) | Onset<br>potential<br>(mV) | Potential<br>(vs RHE) at<br>80 mA/cm <sup>2</sup><br>(mV) | Tafel<br>slope<br>(mV/dec) | References<br>(in the<br>manuscript) |
|----------------------------------------------------------|--------------------------------------|---------------------|----------------------------|-----------------------------------------------------------|----------------------------|--------------------------------------|
| TiN@Ni <sub>3</sub> N                                    | 1 M KOH                              | 5                   | 15                         | -62                                                       | 42.1                       | <b>This work</b>                     |
| Ni <sub>3</sub> N/Ni-foam                                | 1 M KOH                              | 25                  | 50                         | -290                                                      | 60                         | <b>Ref.13</b>                        |
| NiMoN <sub>x</sub> /C nanosheets                         | 0.1 M HClO <sub>4</sub>              | 2                   | 78                         | /                                                         | 35.9                       | <b>Ref.19</b>                        |
| Ni <sub>2</sub> P nanosheets                             | 0.5 M H <sub>2</sub> SO <sub>4</sub> | 5                   | 50                         | ~ -200                                                    | 68                         | <b>Ref.20</b>                        |
| Ni <sub>0.33</sub> Co <sub>0.67</sub> S <sub>2</sub> NWs | 0.5 M H <sub>2</sub> SO <sub>4</sub> | 5                   | 52                         | -110                                                      | 44.1                       | <b>Ref.21</b>                        |
| Ni <sub>3</sub> S <sub>2</sub> Nanosheet Arrays          | neutral media                        | 50                  | 170                        | >400                                                      | /                          | <b>Ref.25</b>                        |
| NiS/Ni foam                                              | 1 M KOH                              | 5                   | 150                        | 220                                                       | 83                         | <b>Ref.27</b>                        |
| CFP/NiCo <sub>2</sub> O <sub>4</sub> /CuS                | 0.5 M H <sub>2</sub> SO <sub>4</sub> | 2                   | 31                         | -110                                                      | 41                         | <b>Ref.28</b>                        |
| Nickel phosphorus nanoparticles film                     | 1 M KOH                              | 2                   | 98                         | -150                                                      | 55                         | <b>Ref.29</b>                        |
| Ni <sub>5</sub> P <sub>4</sub> films                     | 0.5 M H <sub>2</sub> SO <sub>4</sub> | /                   | ~120                       | >150                                                      | 40                         | <b>Ref.30</b>                        |
| Ni <sub>5</sub> P <sub>4</sub> films                     | 1 M KOH                              | /                   | ~115                       | >150                                                      | 53                         | <b>Ref.30</b>                        |

**Table S2.** Comparison of OER electrocatalytic performance between this work and previously reported materials.

| Materials                            | Electrolyte | Scan rate<br>(mV/s) | Onset<br>potential<br>(V vs<br>RHE) | Potential (vs<br>RHE) at 50<br>mA/cm <sup>2</sup><br>(V) | Tafel<br>slope<br>(mV/dec) | References<br>(in the<br>manuscript) |
|--------------------------------------|-------------|---------------------|-------------------------------------|----------------------------------------------------------|----------------------------|--------------------------------------|
| TiN@Ni <sub>3</sub> N                | 1 M KOH     | 5                   | 1.52                                | 1.65                                                     | 95.4                       | <b>This work</b>                     |
| Ni <sub>3</sub> N nanosheets         | 1 M KOH     | 5                   | 1.55                                | 1.58                                                     | 45                         | <b>Ref.7</b>                         |
| Ni <sub>3</sub> N/Ni-foam            | 1 M KOH     | 25                  | 1.60                                | 1.68                                                     | 120                        | <b>Ref.13</b>                        |
| NiS/Ni foam                          | 1 M KOH     | 5                   | 1.55                                | 1.56                                                     | 89                         | <b>Ref.27</b>                        |
| Nickel phosphorus nanoparticles film | 1 M KOH     | 2                   | 1.55                                | 1.62                                                     | 120                        | <b>Ref.29</b>                        |
| Ni <sub>5</sub> P <sub>4</sub> films | 1 M KOH     | 40                  | 1.58                                | 1.50                                                     | 40                         | <b>Ref.30</b>                        |
| Fe-Ni-Ox-NPs                         | 1 M KOH     | 10                  | 1.48                                | 1.53                                                     | 38                         | <b>Ref.31</b>                        |
| Ni(OH) <sub>2</sub> /NiOOH           | 1 M KOH     | 100                 | 1.56                                | /                                                        | 54                         | <b>Ref.32</b>                        |

## References

S1. X. Lu and X. Zhao, *Nat. Commun.*, **2015**, 6, 6616.

S2. A.J. Esswein, M.J.McMurdo, P. N. Ross, A.T. Bell and T. D. Tilley, *J. Phys. Chem. C*, **2009**, 113, 15068-15072.
